# Supplementary material for: Cause of Death After Surgical Aortic Valve Replacement: SWEDEHEART Observational Study
Source: PubMed Central journal article supplement — J Am Heart Assoc. 2021 Nov 8;10(22):e022627. doi: 10.1161/JAHA.121.022627 (PMC8751948; doi:10.1161/jaha.121.022627), 2021-11-08
Supplement: JAH3-10-e022627-s001.pdf [file JAH3-10-e022627-s001.pdf]

# **Supplemental Material**

**Table S1. Definitions of causes of death. Only the underlying cause of death was used.**

---

|                      | <b>ICD-10<br/>(1997-)</b> |
|----------------------|---------------------------|
| Cardiovascular death | I00-I99                   |
| Cancer death         | C00-C99, D00-D48          |
| Other death          | Remaining                 |

---

ICD = International Statistical Classification of Diseases and Related Health Problems

**Table S2. Crude probability of death at 5, 10, 15, and 20 years after surgery according to cause of death by valve type and surgical procedure in 33108 patients who underwent aortic valve replacement in Sweden between 1997 and 2018.**

|                               | Cardiovascular death, % (95% CI) | Cancer death, % (95% CI) | Other death, % (95% CI) |
|-------------------------------|----------------------------------|--------------------------|-------------------------|
| <b>5 years after surgery</b>  |                                  |                          |                         |
| Valve type                    |                                  |                          |                         |
| Bioprosthesis                 | 11.8% (11.4%-12.2%)              | 4.2% (4.0%-4.5%)         | 5.1% (4.8%-5.3%)        |
| Mechanical                    | 6.9% (6.6%-7.2%)                 | 2.9% (2.7%-3.2%)         | 2.7% (2.5%-2.9%)        |
| Procedure                     |                                  |                          |                         |
| Isolated AVR                  | 8.6% (8.2%-8.9%)                 | 3.6% (3.3%-3.8%)         | 4.2% (4.0%-4.4%)        |
| Combined                      | 12.0% (11.5%-12.4%)              | 4.0% (3.8%-4.3%)         | 4.4% (4.1%-4.6%)        |
| <b>10 years after surgery</b> |                                  |                          |                         |
| Valve type                    |                                  |                          |                         |
| Bioprosthesis                 | 27.6% (26.9%-28.2%)              | 9.3% (8.9%-9.8%)         | 14.1% (13.6%-14.6%)     |
| Mechanical                    | 16.7% (16.1%-17.4%)              | 6.5% (6.0%-7.0%)         | 7.7% (7.2%-8.2%)        |
| Procedure                     |                                  |                          |                         |
| Isolated AVR                  | 20.0% (19.4%-20.6%)              | 7.8% (7.4%-8.3%)         | 11.4% (10.9%-11.9%)     |
| Combined                      | 27.2% (26.5%-27.9%)              | 8.7% (8.2%-9.2%)         | 11.8% (11.3%-12.3%)     |
| <b>15 years after surgery</b> |                                  |                          |                         |
| Valve type                    |                                  |                          |                         |
| Bioprosthesis                 | 41.1% (40.3%-41.9%)              | 12.5% (11.9%-13.0%)      | 23.1% (22.3%-23.8%)     |
| Mechanical                    | 26.0% (25.1%-26.9%)              | 8.8% (8.2%-9.4%)         | 12.9% (12.2%-13.7%)     |

| Procedure                     |                     |                     |                     |
|-------------------------------|---------------------|---------------------|---------------------|
| Isolated AVR                  | 30.1% (29.3%-31.0%) | 10.4% (9.8%-10.9%)  | 18.5% (17.7%-19.2%) |
| Combined                      | 40.0% (39.0%-40.9%) | 11.6% (11.0%-12.2%) | 19.1% (18.3%-19.9%) |
| <b>20 years after surgery</b> |                     |                     |                     |
| Valve type                    |                     |                     |                     |
| Bioprosthesis                 | 50.2% (49.2%-51.2%) | 14.6% (13.9%-15.3%) | 29.1% (28.1%-30.0%) |
| Mechanical                    | 32.8% (31.6%-33.9%) | 10.3% (9.6%-11.0%)  | 16.6% (15.7%-17.6%) |
| Procedure                     |                     |                     |                     |
| Isolated AVR                  | 37.3% (36.2%-38.4%) | 12.1% (11.4%-12.8%) | 23.3% (22.4%-24.3%) |
| Combined                      | 48.5% (47.3%-49.6%) | 13.5% (12.7%-14.2%) | 24.1% (23.1%-25.1%) |

CI = confidence interval

**Table S3. Observed and expected deaths and standardized mortality ratios with 95% confidence intervals for different causes of deaths according to valve type and surgical procedure in 33108 patients who underwent aortic valve replacement in Sweden between 1997 and 2018.**

|                   | All-Cause mortality<br>n = 14 237 (100%) |          |                     | Cardiovascular death<br>n = 7778 (%) |          |                     | Cancer death<br>n = 2483 (%) |          |                     | Other death<br>n = 3976 (%) |          |                     |
|-------------------|------------------------------------------|----------|---------------------|--------------------------------------|----------|---------------------|------------------------------|----------|---------------------|-----------------------------|----------|---------------------|
|                   | Observed                                 | Expected | SMR<br>(95% CI)     | Observed                             | Expected | SMR<br>(95% CI)     | Observed                     | Expected | SMR<br>(95% CI)     | Observed                    | Expected | SMR<br>(95% CI)     |
| <b>Valve type</b> |                                          |          |                     |                                      |          |                     |                              |          |                     |                             |          |                     |
| Bioprosthesis     | 10232                                    | 8205.4   | 1.25<br>(1.22-1.27) | 5588                                 | 3471.3   | 1.61<br>(1.57-1.65) | 1735                         | 1815.6   | 0.96<br>(0.91-1.00) | 2909                        | 2918.5   | 1.00<br>(0.96-1.03) |
| Mechanical        | 4005                                     | 2280.3   | 1.76<br>(1.70-1.81) | 2190                                 | 875.5    | 2.50<br>(2.40-2.61) | 748                          | 657.1    | 1.14<br>(1.06-1.22) | 1067                        | 747.8    | 1.43<br>(1.34-1.52) |
| <b>Procedure</b>  |                                          |          |                     |                                      |          |                     |                              |          |                     |                             |          |                     |
| Isolated AVR      | 6648                                     | 5253.6   | 1.27<br>(1.24-1.30) | 3444                                 | 2155.9   | 1.60<br>(1.55-1.65) | 1207                         | 1231.9   | 0.98<br>(0.93-1.04) | 1997                        | 1865.8   | 1.07<br>(1.02-1.12) |
| Combined          | 7589                                     | 5232.1   | 1.45<br>(1.42-1.48) | 4334                                 | 2190.9   | 1.98<br>(1.92-2.04) | 1276                         | 1240.7   | 1.03<br>(0.97-1.09) | 1979                        | 1800.5   | 1.10<br>(1.05-1.15) |

SMR = standardized mortality ratio, CI = confidence interval.

**Table S4. Observed and expected deaths and standardized mortality ratios with 95% confidence intervals for cardiovascular cause of deaths according to sex and age groups in patients who underwent aortic valve replacement in Sweden between 1997 and 2018.**

| Age groups | Men<br>n = 20967 (63%) |          |                  | Women<br>n = 12141 (37%) |          |                  |
|------------|------------------------|----------|------------------|--------------------------|----------|------------------|
|            | Observed               | Expected | SMR<br>(95% CI)  | Observed                 | Expected | SMR<br>(95% CI)  |
| 20-24      | 0                      | 0.01     | -                | 0                        | 0.00     | -                |
| 25-29      | 1                      | 0.03     | 37.4 (5.3-266)   | 0                        | 0.00     | -                |
| 30-34      | 1                      | 0.06     | 17.7 (2.5-126)   | 2                        | 0.01     | 258 (64.4-1030)  |
| 35-39      | 9                      | 0.17     | 52.4 (27.3-101)  | 1                        | 0.02     | 47.5 (6.7-337)   |
| 40-44      | 13                     | 0.61     | 21.4 (12.4-36.8) | 0                        | 0.06     | -                |
| 45-49      | 21                     | 1.88     | 11.2 (7.3-17.1)  | 7                        | 0.19     | 36.6 (17.5-76.9) |
| 50-54      | 40                     | 5.51     | 7.3 (5.3-9.9)    | 12                       | 0.53     | 22.6 (12.8-39.8) |
| 55-59      | 101                    | 16.25    | 6.2 (5.1-7.6)    | 27                       | 1.76     | 15.4 (10.5-22.4) |
| 60-64      | 170                    | 43.72    | 3.9 (3.3-4.5)    | 58                       | 5.79     | 10.0 (7.7-12.9)  |
| 65-69      | 324                    | 102.09   | 3.2 (2.8-3.5)    | 128                      | 17.47    | 7.3 (6.2-8.7)    |
| 70-74      | 583                    | 217.07   | 2.7 (2.5-2.9)    | 252                      | 54.43    | 4.6 (4.1-5.2)    |
| 75-79      | 908                    | 437.20   | 2.1 (1.9-2.2)    | 496                      | 179.80   | 2.8 (2.5-3.0)    |
| 80-84      | 1069                   | 690.64   | 1.5 (1.5-1.6)    | 840                      | 436.62   | 1.9 (1.8-2.1)    |
| 85+        | 1236                   | 1022.74  | 1.2 (1.1-1.3)    | 1479                     | 1112.10  | 1.3 (1.3-1.4)    |

SMR = standardized mortality ratio, CI = confidence interval

**Table S5. Observed and expected deaths and standardized mortality ratios with 95% confidence intervals for different causes of deaths according to sex and age groups in patients who underwent aortic valve replacement in Sweden between 1997 and 2018. Patients who died within 90 days of surgery were excluded.**

|                         | All-Cause mortality<br>n=13060 (100%) |          |                     | Cardiovascular death<br>n=6764 (52%) |          |                      | Cancer death<br>n=2464 (19%) |          |                     | Other death<br>n=3829 (29%) |          |                     |
|-------------------------|---------------------------------------|----------|---------------------|--------------------------------------|----------|----------------------|------------------------------|----------|---------------------|-----------------------------|----------|---------------------|
|                         | Observed                              | Expected | SMR<br>(95% CI)     | Observed                             | Expected | SMR<br>(95% CI)      | Observed                     | Expected | SMR<br>(95%CI)      | Observed                    | Expected | SMR<br>(95%CI)      |
| <b>Total population</b> | 13060                                 | 10481.6  | 1.25<br>(1.22-1.27) | 6764                                 | 4345.1   | 1.56<br>(1.52-1.59)  | 2467                         | 2471.5   | 1.00<br>(0.96-1.04) | 3829                        | 3665.0   | 1.04<br>(1.01-1.08) |
| <b>Sex</b>              |                                       |          |                     |                                      |          |                      |                              |          |                     |                             |          |                     |
| Men                     | 7715                                  | 6227.9   | 1.24<br>(1.21-1.27) | 3892                                 | 2536.9   | 1.53<br>(1.49-1.58)  | 1625                         | 1635.2   | 0.99<br>(0.95-1.04) | 2198                        | 2055.8   | 1.07<br>(1.03-1.11) |
| Women                   | 5345                                  | 4253.8   | 1.26<br>(1.22-1.29) | 2872                                 | 1808.2   | 1.59<br>(1.53-1.65)  | 842                          | 836.3    | 1.01<br>(0.94-1.08) | 1631                        | 1609.2   | 1.01<br>(0.97-1.06) |
| <b>Age groups</b>       |                                       |          |                     |                                      |          |                      |                              |          |                     |                             |          |                     |
| 20-24                   | 0                                     | 0.25     | -                   | 0                                    | 0.01     | -                    | 0                            | 0.02     | -                   | 0                           | 0.22     | -                   |
| 25-29                   | 3                                     | 0.54     | 5.59<br>(1.80-17.3) | 1                                    | 0.03     | 32.59<br>(4.59-231)  | 0                            | 0.05     | -                   | 2                           | 0.46     | 4.39<br>(1.10-17.5) |
| 30-34                   | 5                                     | 0.90     | 5.55<br>(2.31-13.3) | 1                                    | 0.06     | 15.57<br>(2.19-111)  | 0                            | 0.12     | -                   | 4                           | 0.71     | 5.61<br>(2.11-14.9) |
| 35-39                   | 17                                    | 1.7      | 9.92<br>(6.17-15.9) | 7                                    | 0.2      | 36.3<br>(17.3-76.2)  | 2                            | 0.3      | 5.82<br>(1.46-23.3) | 8                           | 1.2      | 6.79<br>(3.40-13.6) |
| 40-44                   | 17                                    | 3.9      | 4.36<br>(2.71-7.02) | 9                                    | 0.7      | 13.52<br>(7.03-26.0) | 2                            | 0.9      | 2.11<br>(0.53-8.43) | 6                           | 2.3      | 2.63<br>(1.18-5.85) |
| 45-49                   | 37                                    | 9.4      | 3.93<br>(2.85-5.42) | 14                                   | 2.1      | 6.75<br>(4.00-11.4)  | 7                            | 2.6      | 2.66<br>(1.27-5.57) | 16                          | 4.7      | 3.39<br>(2.08-5.54) |
| 50-54                   | 64                                    | 24.1     | 2.66<br>(2.08-3.39) | 28                                   | 6.0      | 4.64<br>(3.20-6.72)  | 10                           | 7.9      | 1.27<br>(0.68-2.36) | 26                          | 10.2     | 2.55<br>(1.74-3.74) |
| 55-59                   | 174                                   | 64.7     | 2.69<br>(2.32-3.12) | 91                                   | 18.0     | 5.06<br>(4.12-6.21)  | 36                           | 24.3     | 1.48<br>(1.07-2.06) | 47                          | 22.4     | 2.10<br>(1.57-2.79) |
| 60-64                   | 365                                   | 169.1    | 2.16<br>(1.95-2.39) | 173                                  | 49.5     | 3.50<br>(3.01-4.06)  | 96                           | 68.8     | 1.40<br>(1.14-1.71) | 96                          | 50.8     | 1.89<br>(1.55-2.31) |

|       |      |        |                     |      |        |                     |     |       |                     |      |        |                     |
|-------|------|--------|---------------------|------|--------|---------------------|-----|-------|---------------------|------|--------|---------------------|
| 65-69 | 713  | 389.5  | 1.83<br>(1.70-1.97) | 345  | 119.5  | 2.89<br>(2.60-3.21) | 185 | 160.9 | 1.15<br>(1.00-1.33) | 183  | 109.0  | 1.68<br>(1.45-1.94) |
| 70-74 | 1371 | 822.1  | 1.67<br>(1.58-1.76) | 649  | 271.3  | 2.39<br>(2.21-2.58) | 358 | 322.7 | 1.11<br>(1.00-1.23) | 364  | 228.1  | 1.60<br>(1.44-1.77) |
| 75-79 | 2134 | 1668.6 | 1.28<br>(1.23-1.33) | 1093 | 616.5  | 1.77<br>(1.67-1.88) | 518 | 549.5 | 0.94<br>(0.86-1.03) | 523  | 502.6  | 1.04<br>(0.96-1.13) |
| 80-84 | 3313 | 2742.6 | 1.21<br>(1.17-1.25) | 1697 | 1126.7 | 1.51<br>(1.44-1.58) | 681 | 686.9 | 0.99<br>(0.92-1.07) | 935  | 928.9  | 1.01<br>(0.94-1.07) |
| 85+   | 4847 | 4584.2 | 1.06<br>(1.03-1.09) | 2656 | 2134.5 | 1.24<br>(1.20-1.29) | 572 | 646.4 | 0.88<br>(0.82-0.96) | 1619 | 1803.3 | 0.90<br>(0.86-0.94) |

SMR = standardized mortality ratio, CI = confidence interval



**Figure S1. Number of operations per year in Sweden from 1997 to 2018.**

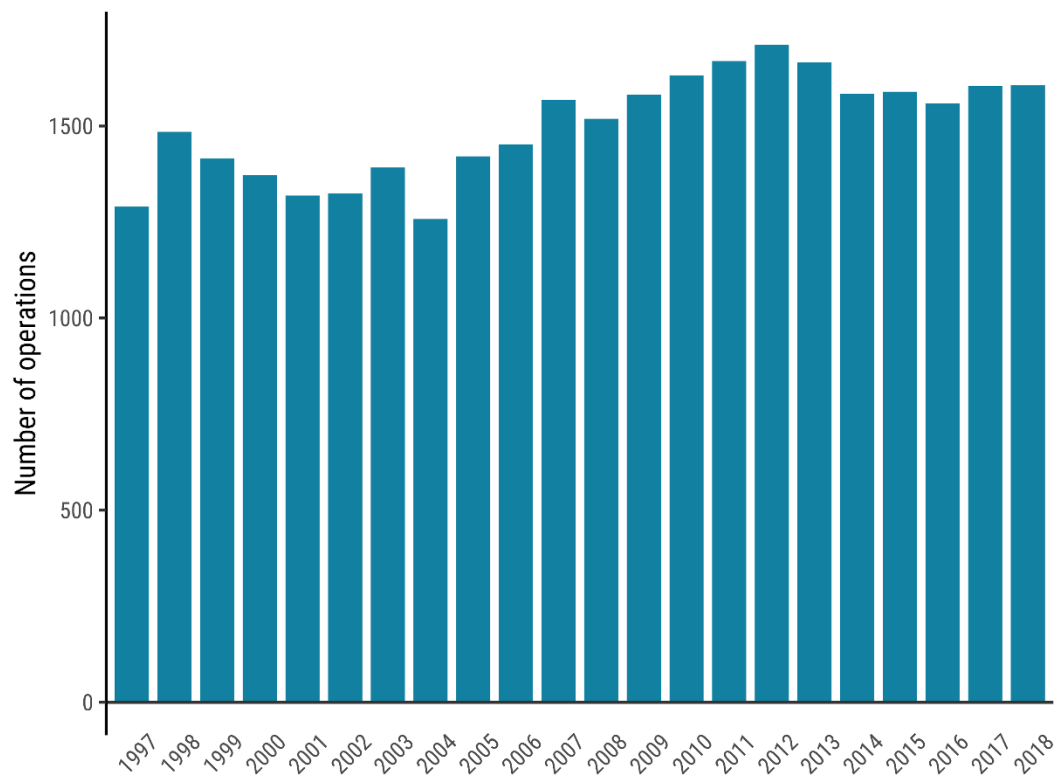

**Figure S2. Crude probability of death at 10 years after surgery according to cause of death by age group and sex in 33108 patients who underwent aortic valve replacement in Sweden between 1997 and 2018.**

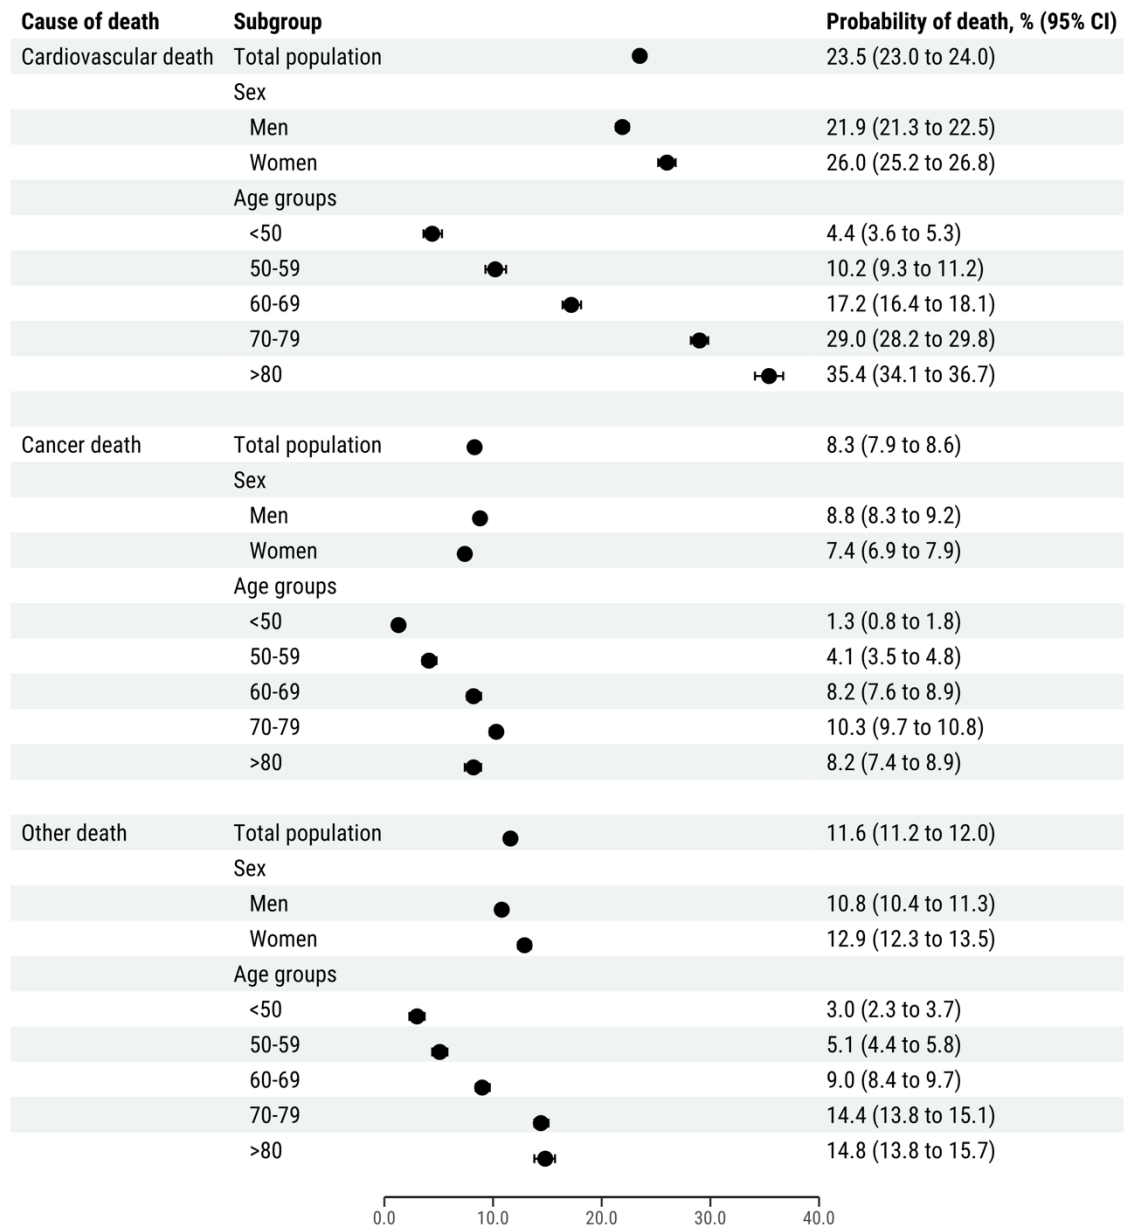

CI = confidence interval

**Figure S3. Crude probability of death at 20 years after surgery according to cause of death by age group and sex in 33108 patients who underwent aortic valve replacement in Sweden between 1997 and 2018.**

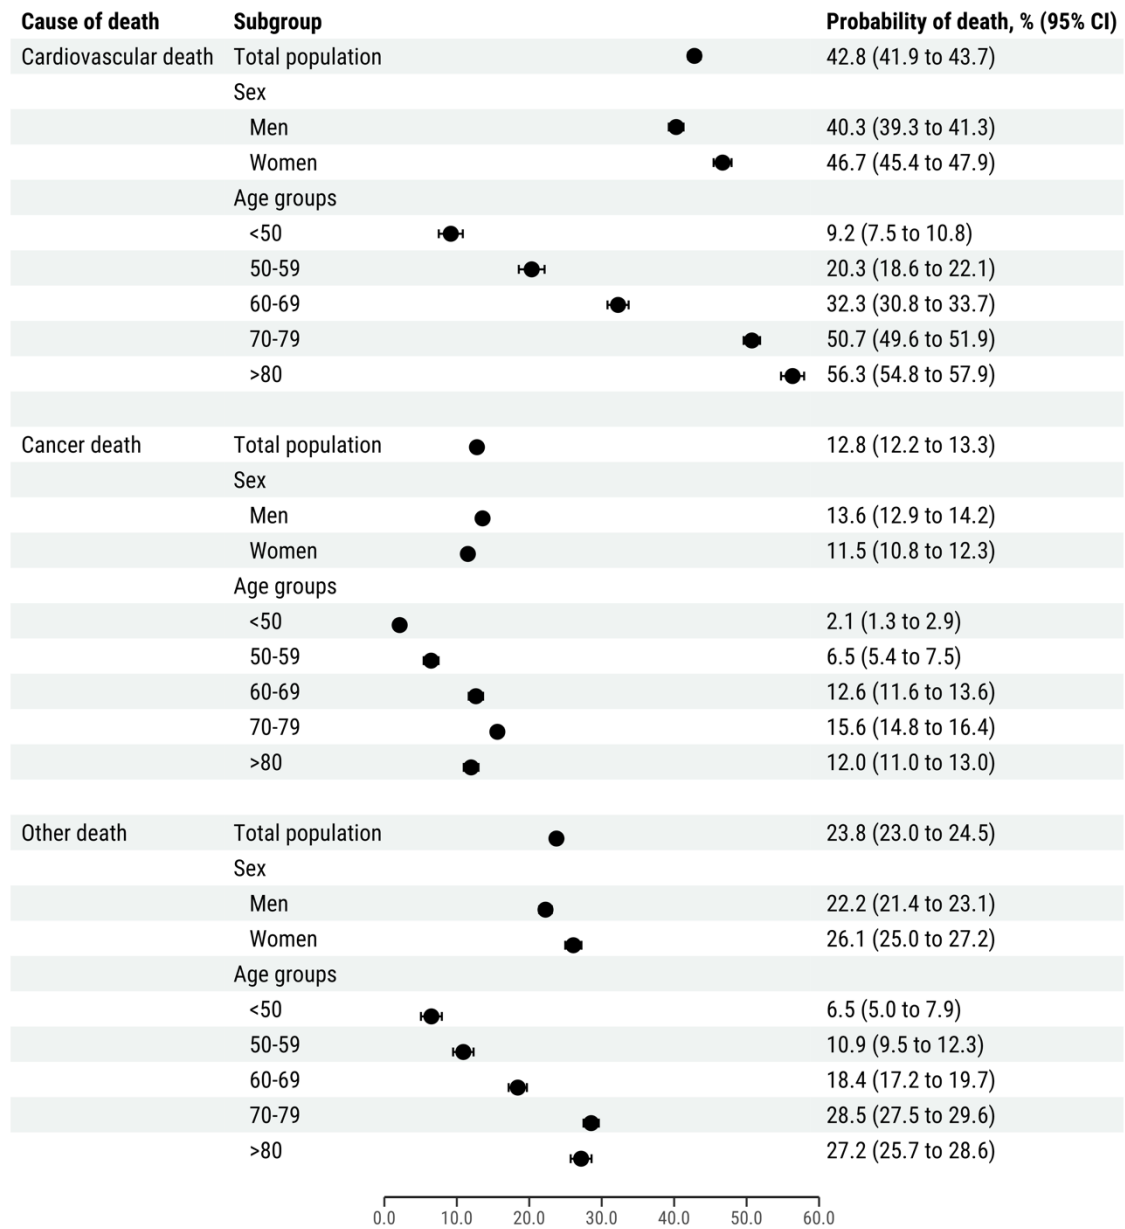

CI = confidence interval

**Figure S4. Crude probability of cause-specific death over time since surgery according to surgical procedure and valve type in 33108 patients who underwent aortic valve replacement in Sweden between 1997 and 2018. The white area shows the probability of being alive.**

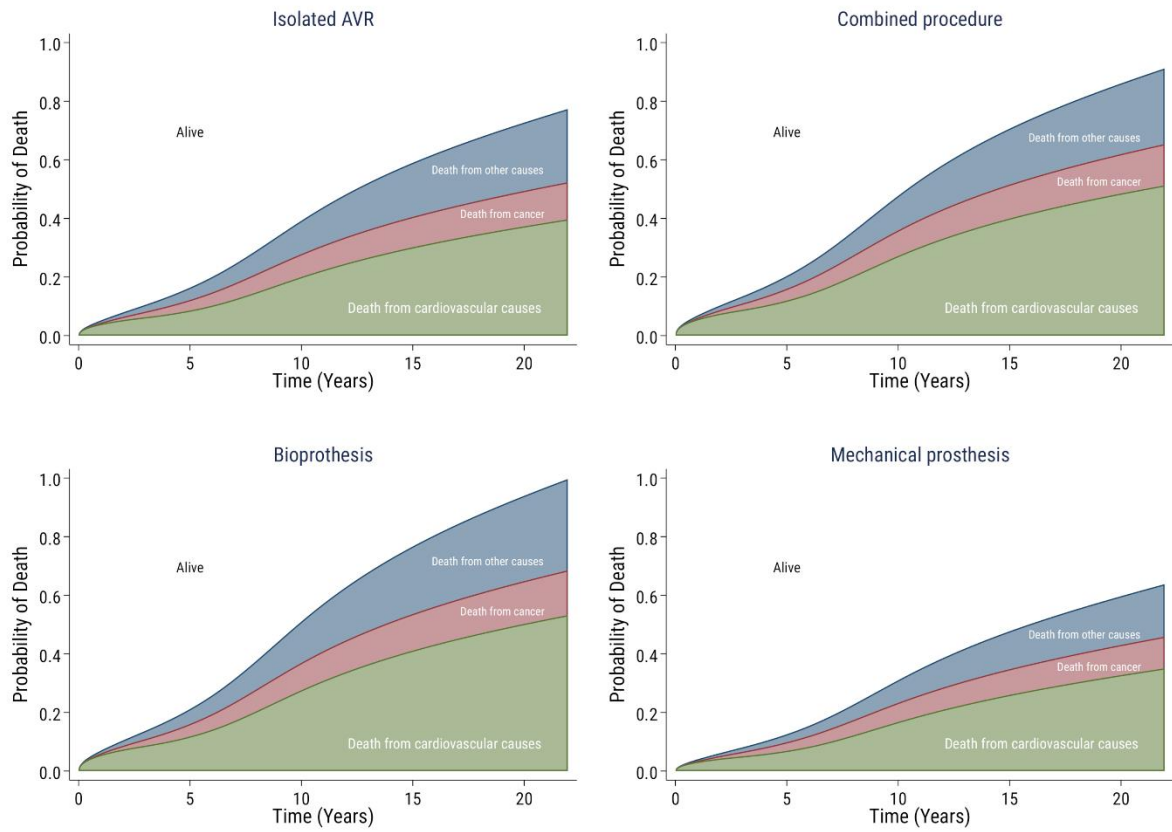

Figure S5. Standardized mortality ratios with 95% confidence intervals for cardiovascular cause of death according to sex and age groups in patients who underwent aortic valve replacement in Sweden between 1997 and 2018.

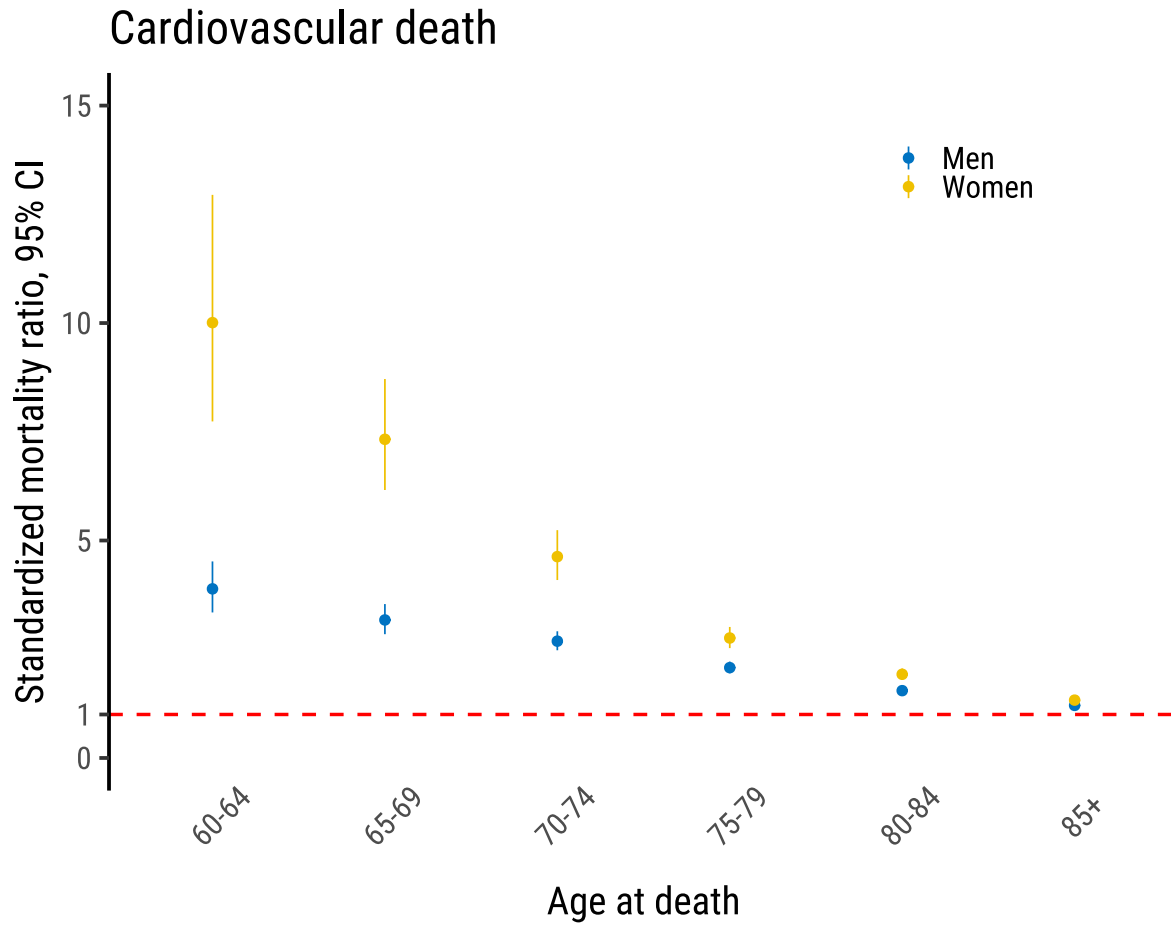

CI = confidence interval
